# Supplementary material
Source: PubMed Central journal article supplement (PMC6309494)
Supplement: NIHMS1508988-supplement-1.pdf [file NIHMS1508988-supplement-1.pdf]

Supplementary Table S1: Baseline characteristics of participants in the Hp-CRC Consortium, by cohort

|                                              | CLUE<br>(N=982) | CPSII<br>(N=722) | HPFS<br>(N=302) | MEC<br>(N=1510) | NHS<br>(N=576) | NYUWHS<br>(N=572) | PHS<br>(N=360) | PLCO<br>(N=1240) | SCCS<br>(N=252) | WHI<br>(N=1610) | Total<br>(N=8126) |
|----------------------------------------------|-----------------|------------------|-----------------|-----------------|----------------|-------------------|----------------|------------------|-----------------|-----------------|-------------------|
| <b>Age</b>                                   |                 |                  |                 |                 |                |                   |                |                  |                 |                 |                   |
| N                                            | 982             | 722              | 302             | 1510            | 576            | 572               | 360            | 1240             | 252             | 1610            | 8126              |
| Mean (SD)                                    | 52 (12.2)       | 71 (5.5)         | 65 (8.7)        | 69 (8.2)        | 58 (6.9)       | 55 (7.7)          | 69 (8.2)       | 65 (5.1)         | 55 (8.8)        | 66 (6.9)        | 63 (10.1)         |
| Median                                       | 53              | 71               | 66              | 69              | 59             | 58                | 69             | 64               | 55              | 66              | 64                |
| Q1, Q3                                       | 44, 60          | 67, 75           | 58, 72          | 63, 76          | 53, 64         | 50, 62            | 64, 74         | 61, 69           | 47, 63          | 61, 71          | 58, 71            |
| Range                                        | (18-82)         | (57-87)          | (47-81)         | (49-87)         | (43-70)        | (36-66)           | (51-89)        | (55-75)          | (40-76)         | (50-79)         | (18-89)           |
| <b>Sex</b>                                   |                 |                  |                 |                 |                |                   |                |                  |                 |                 |                   |
| Female                                       | 554 (56%)       | 368 (51%)        | 0 (0%)          | 716 (47%)       | 576 (100%)     | 572 (100%)        | 0 (0%)         | 572 (46%)        | 144 (57%)       | 1610 (100%)     | 5112 (63%)        |
| Male                                         | 428 (44%)       | 354 (49%)        | 302 (100%)      | 794 (53%)       | 0 (0%)         | 0 (0%)            | 360 (100%)     | 668 (54%)        | 108 (43%)       | 0 (0%)          | 3014 (37%)        |
| <b>Race</b>                                  |                 |                  |                 |                 |                |                   |                |                  |                 |                 |                   |
| White                                        | 974 (99%)       | 712 (99%)        | 290 (96%)       | 226 (15%)       | 576 (100%)     | 446 (78%)         | 342 (95%)      | 1098 (89%)       | 74 (29%)        | 1396 (87%)      | 6134 (75%)        |
| Black                                        | 8 (1%)          | 6 (1%)           | 0 (0%)          | 286 (19%)       | 0 (0%)         | 62 (11%)          | 2 (1%)         | 98 (8%)          | 172 (68%)       | 164 (10%)       | 798 (10%)         |
| Asian                                        | 0 (0%)          | 2 (0%)           | 0 (0%)          | 570 (38%)       | 0 (0%)         | 6 (1%)            | 12 (3%)        | 24 (2%)          | 0 (0%)          | 0 (0%)          | 614 (8%)          |
| Latino                                       | 0 (0%)          | 0 (0%)           | 0 (0%)          | 332 (22%)       | 0 (0%)         | 20 (3%)           | 4 (1%)         | 16 (1%)          | 0 (0%)          | 50 (3%)         | 422 (5%)          |
| Other/unknown/multiracial                    | 0 (0%)          | 2 (0%)           | 12 (4%)         | 96 (6%)         | 0 (0%)         | 38 (7%)           | 0 (0%)         | 4 (0%)           | 6 (2%)          | 0 (0%)          | 158 (2%)          |
| <b>Education</b>                             |                 |                  |                 |                 |                |                   |                |                  |                 |                 |                   |
| Missing                                      | 3 (0%)          | 2 (0%)           | 0 (0%)          | 9 (1%)          | 0 (0%)         | 73 (13%)          | 0 (0%)         | 1 (0%)           | 5 (2%)          | 15 (1%)         | 108 (1%)          |
| Less Than High School                        | 399 (41%)       | 22 (3%)          | 0 (0%)          | 215 (14%)       | 0 (0%)         | 35 (6%)           | 0 (0%)         | 119 (10%)        | 99 (39%)        | 83 (5%)         | 972 (12%)         |
| Completed high school or GED                 | 356 (36%)       | 153 (21%)        | 0 (0%)          | 343 (23%)       | 0 (0%)         | 156 (27%)         | 0 (0%)         | 308 (25%)        | 76 (30%)        | 276 (17%)       | 1668 (21%)        |
| Post high school training other than college | 0 (0%)          | 58 (8%)          | 0 (0%)          | 0 (0%)          | 0 (0%)         | 9 (2%)            | 0 (0%)         | 147 (12%)        | 6 (2%)          | 142 (9%)        | 362 (4%)          |
| Some College                                 | 122 (12%)       | 180 (25%)        | 0 (0%)          | 494 (33%)       | 0 (0%)         | 120 (21%)         | 0 (0%)         | 261 (21%)        | 50 (20%)        | 445 (28%)       | 1672 (21%)        |
| College graduate                             | 53 (5%)         | 153 (21%)        | 0 (0%)          | 261 (17%)       | 531 (92%)      | 88 (15%)          | 0 (0%)         | 218 (18%)        | 10 (4%)         | 169 (10%)       | 1483 (18%)        |
| Graduate School                              | 49 (5%)         | 154 (21%)        | 302 (100%)      | 188 (12%)       | 45 (8%)        | 91 (16%)          | 360 (100%)     | 186 (15%)        | 6 (2%)          | 480 (30%)       | 1861 (23%)        |
| <b>BMI</b>                                   |                 |                  |                 |                 |                |                   |                |                  |                 |                 |                   |
| Missing                                      | 982             | 5                | 19              | 3               | 4              | 6                 | 0              | 22               | 9               | 25              | 1075              |
| <20                                          | 0 (0%)          | 260 (36%)        | 104 (37%)       | 443 (29%)       | 272 (48%)      | 268 (47%)         | 116 (32%)      | 330 (27%)        | 51 (21%)        | 470 (30%)       | 2314 (33%)        |
| 20- <25                                      | 0 (0%)          | 19 (3%)          | 4 (1%)          | 65 (4%)         | 18 (3%)        | 24 (4%)           | 3 (1%)         | 18 (1%)          | 10 (4%)         | 33 (2%)         | 194 (3%)          |
| 25- <30                                      | 0 (0%)          | 311 (43%)        | 144 (51%)       | 633 (42%)       | 182 (32%)      | 189 (33%)         | 193 (54%)      | 551 (45%)        | 70 (29%)        | 579 (37%)       | 2852 (40%)        |
| >=30                                         | 0 (0%)          | 127 (18%)        | 31 (11%)        | 366 (24%)       | 100 (17%)      | 85 (15%)          | 48 (13%)       | 319 (26%)        | 112 (46%)       | 503 (32%)       | 1691 (24%)        |
| <b>Smoking</b>                               |                 |                  |                 |                 |                |                   |                |                  |                 |                 |                   |
| Missing                                      | 0               | 1                | 10              | 2               | 3              | 41                | 1              | 0                | 5               | 26              | 89                |
| Never smoker                                 | 460 (47%)       | 325 (45%)        | 125 (43%)       | 594 (39%)       | 254 (44%)      | 255 (48%)         | 155 (43%)      | 572 (46%)        | 84 (34%)        | 804 (51%)       | 3628 (45%)        |
| Normer smoker                                | 245 (25%)       | 375 (52%)        | 154 (53%)       | 675 (45%)       | 233 (41%)      | 183 (34%)         | 183 (51%)      | 555 (45%)        | 62 (25%)        | 693 (44%)       | 3358 (42%)        |
| Current smoker                               | 277 (28%)       | 21 (3%)          | 13 (4%)         | 239 (16%)       | 86 (15%)       | 93 (18%)          | 21 (6%)        | 113 (9%)         | 101 (41%)       | 87 (5%)         | 1051 (13%)        |
| <b>Family history of CRC</b>                 |                 |                  |                 |                 |                |                   |                |                  |                 |                 |                   |
| Missing                                      | 982             | 0                | 0               | 17              | 2              | 572               | 54             | 44               | 252             | 129             | 2052              |
| No                                           | 0 (0%)          | 609 (84%)        | 249 (82%)       | 1292 (87%)      | 495 (86%)      | 0 (0%)            | 276 (90%)      | 1063 (89%)       | 0 (0%)          | 1183 (80%)      | 5167 (85%)        |
| Yes                                          | 0 (0%)          | 113 (16%)        | 53 (18%)        | 201 (13%)       | 79 (14%)       | 0 (0%)            | 30 (10%)       | 133 (11%)        | 0 (0%)          | 298 (20%)       | 907 (15%)         |

**Supplementary Table S2: *H. pylori* multiplex serology antigens**

| Sytematic name | Name                               | Full name                                      | Acc. No <sup>1</sup> | Selected amino acids | Strain         | Cut-off [MFI] | N+C |
|----------------|------------------------------------|------------------------------------------------|----------------------|----------------------|----------------|---------------|-----|
| HP0010         | GroEL                              | Chaperonin GroEL                               | AM_997163            | 1-547                | G27            | 68            |     |
| HP0073         | UreA                               | Urease alpha subunit                           | NP_206873            | 1-238                | 26695          | 95            |     |
| HP0231         | HP0231                             | Hypothetical protein                           | NP_207029            | 1-265                | 26695          | 95            |     |
| HP0243         | NapA                               | Neutrophil-activating protein                  | NP_207041            | 1-144                | 26695          | 66            |     |
| HP0305         | HP0305                             | Hypothetical protein                           | NP_207103            | 1-184                | 26695          | 55            |     |
| HP0410         | HpaA                               | Neuraminylactose-binding hemagglutinin homolog | NP_207208            | 1-249                | 26695          | 73            |     |
| HP0547         | CagA N-Terminus<br>CagA C-Terminus | Cytotoxin-associated antigen A                 | NP_207343            | 1-650<br>641-1186    | 26695<br>26695 |               | 654 |
| HP0695         | HyuA N-Terminus<br>HyuA C-Terminus | Hydantoin utilization protein A                | NP_207208            | 1-220<br>210-713     | 26695          |               | 114 |
| HP0875         | Catalase                           | Catalase                                       | NP_207669            | 1-505                | 26695          | 107           |     |
| HP0887         | VacA N-Terminus<br>VacA C-Terminus | Vacuolating cytotoxin A                        | NP_207680            | 34-363<br>328-1008   | 26695<br>26695 |               | 64  |
| HP1098         | HcpC                               | Conserved hypothetical secreted protein        | NP_207889            | 1-290                | 26695          | 30            |     |
| HP1104         | Cad                                | Cinnamyl alcohol dehydrogenase ELI3-2          | NP_207895            | 1-348                | 26695          | 88            |     |
| HP1564         | Omp                                | Outer membrane protein                         | NP_208355            | 1-271                | 26695          | 137           |     |

<sup>1</sup> NCBI reference sequence

Supplementary Table S3: Conditional logistic regression models, with adjustment for potential confounders

|                   | Odds of CRC             |                          |                       |                        |                          |
|-------------------|-------------------------|--------------------------|-----------------------|------------------------|--------------------------|
|                   | Unadjusted model<br>(1) | Model + education<br>(2) | Model +<br>BMI<br>(3) | Model + smoking<br>(4) | Fully<br>adjusted<br>(5) |
| <b>ALL</b>        |                         |                          |                       |                        |                          |
| <i>N</i>          | 8,126                   | 7,942                    | 6,960                 | 7,956                  | 6,696                    |
| HP+VacA+ OR       | 1.11 <sup>**</sup>      | 1.10 <sup>*</sup>        | 1.11 <sup>*</sup>     | 1.10 <sup>*</sup>      | 1.09                     |
| HP+VacA+ CI       | (1.01, 1.22)            | (0.99, 1.21)             | (1.00, 1.23)          | (1.00, 1.21)           | (0.98, 1.22)             |
| p-value           | 0.038                   | 0.069                    | 0.062                 | 0.059                  | 0.117                    |
| <b>BLACK ONLY</b> |                         |                          |                       |                        |                          |
| <i>N</i>          | 798                     | 762                      | 748                   | 776                    | 716                      |
| HP+VacA+ OR       | 1.45 <sup>**</sup>      | 1.46 <sup>**</sup>       | 1.48 <sup>**</sup>    | 1.41 <sup>**</sup>     | 1.48 <sup>**</sup>       |
| HP+VacA+ CI       | (1.08, 1.95)            | (1.08, 1.98)             | (1.09, 2.02)          | (1.05, 1.90)           | (1.08, 2.03)             |
| p-value           | 0.013                   | 0.014                    | 0.011                 | 0.023                  | 0.015                    |

Notes:

<sup>\*\*\*</sup>Significant at the 1 percent level.

<sup>\*\*</sup>Significant at the 5 percent level.

<sup>\*</sup>Significant at the 10 percent level.
